# Supplementary material
Source: HighWire-hosted journal article supplement (https://jnis.bmj.com/highwire/filestream/172286/field_highwire_adjunct_files/1/neurintsurg-2022-019008supp002_data_supplement.pdf)
Supplement: neurintsurg-2022-019008supp002_data_supplement.pdf [file neurintsurg-2022-019008supp002_data_supplement.pdf]

| <b>Study</b>  | <b>Definition of ENI</b>                 | <b>Definition of sICH</b>                                                           |
|---------------|------------------------------------------|-------------------------------------------------------------------------------------|
| Weyland, 2021 | Any improvement in NIHSS                 | Heidelberg Bleeding Classification                                                  |
| Guenego, 2020 | Improvement of 8 or more points in NIHSS | N/A                                                                                 |
| Sun, 2021     | Improvement of 8 or more points in NIHSS | N/A                                                                                 |
| Wirtz, 2019   | Improvement of 8 or more points in NIHSS | N/A                                                                                 |
| Heit, 2019    | Improvement of 8 or more points in NIHSS | Increase of at least 4 points in NIHSS and no hemorrhage on imaging within 36 hours |
| Soize, 2019   | Improvement of 4 or more points in NIHSS | N/A                                                                                 |
| Pu, 2018      | Improvement of 12% or greater in NIHSS   | Heidelberg Bleeding Classification                                                  |
| Cao, 2017     | Improvement of 30% or greater in NIHSS   | N/A                                                                                 |
| Cai, 2021     | Improvement of 8 or more points in NIHSS | N/A                                                                                 |

**Supplementary Table S1. Definitions of ENI and sICH of the included studies**

**Supplementary Table S2 Risk of bias assessment.** Risk of bias was assessed using “ROBINS-I: a tool for assessing risk of bias in non-randomised studies of interventions”.

| <b>Study</b>  | <b>D1</b> | <b>D2</b> | <b>D3</b> | <b>D4</b>      | <b>D5</b> | <b>D6</b> | <b>D7</b> | <b>Overall</b> |
|---------------|-----------|-----------|-----------|----------------|-----------|-----------|-----------|----------------|
| Weyland, 2021 | Moderate  | Low       | Low       | No information | Low       | Moderate  | Low       | Moderate       |
| Guenego, 2020 | Moderate  | Low       | Moderate  | No information | Low       | Moderate  | Low       | Moderate       |
| Sun, 2021     | Low       | Low       | Moderate  | No information | Low       | Low       | Low       | Low            |
| Wirtz, 2019   | Moderate  | Low       | Low       | No information | Low       | Moderate  | Low       | Moderate       |
| Heit, 2019    | Low       | Low       | Low       | No information | Low       | Low       | Low       | Low            |
| Soize, 2019   | Moderate  | Low       | Moderate  | No information | Low       | Moderate  | Low       | Moderate       |
| Pu, 2018      | Moderate  | Low       | Moderate  | No information | Low       | Moderate  | Low       | Moderate       |
| Cao, 2017     | Moderate  | Low       | Low       | No information | Low       | Moderate  | Low       | Moderate       |
| Cai, 2021     | Low       | Low       | Low       | No information | Low       | Low       | Low       | Low            |

**Supplementary Figure S1 PRISMA flow diagram showing the review process.**
